# Supplementary material
Source: bioRxiv or medRxiv preprint supplement (https://medrxiv.org/highwire/filestream/70479/field_highwire_adjunct_files/0/19013474-1.pdf)
Supplement: Supplementary file [file 19013474-1.pdf]

## Contents

|                                                                                                                                                                                               |    |
|-----------------------------------------------------------------------------------------------------------------------------------------------------------------------------------------------|----|
| Data selection flow diagrams .....                                                                                                                                                            | 2  |
| Flow diagram 1: Anti-asthma medication data .....                                                                                                                                             | 2  |
| Flow diagram 2: Primary care center (PCC data) for respiratory diagnoses .....                                                                                                                | 3  |
| Flow diagram 3: Hospital emergency department visits data for selected diagnoses .....                                                                                                        | 4  |
| Supplementary figures .....                                                                                                                                                                   | 5  |
| Figure S1 Days with high SO <sub>2</sub> (>125 ug/m <sup>3</sup> ) and associations with respiratory health outcomes across lags 0-10 (plotted using DLNM) .....                              | 5  |
| Figure S2 Concentration-response for SO <sub>2</sub> and health outcomes (plotted using DLNM) .....                                                                                           | 6  |
| Figure S3 Associations between high SO <sub>2</sub> days (>125 ug/m <sup>3</sup> ) and subcategories of PCMD and HED (plotted using DLNM) .....                                               | 7  |
| Figure S4 Lag-associations to lag 20 (plotted using DLNM) .....                                                                                                                               | 8  |
| Figure S5 Time series of daily mean of air pollutants 2010-2014 .....                                                                                                                         | 9  |
| Supplementary tables .....                                                                                                                                                                    | 10 |
| Table S1 Percent increased risk in respiratory health outcomes associated with daily SO <sub>2</sub> exposure at lag 0-2, not adjusting for other pollutants (corresponding to Table 3) ..... | 10 |
| Table S2 Sensitivity analyses: Outcome variable definitions .....                                                                                                                             | 11 |
| Table S3 Sensitivity analyses: Exposure definitions and subsets .....                                                                                                                         | 12 |
| Table S4a Correlation matrix .....                                                                                                                                                            | 14 |
| Table S4b Period after eruption began 31 August 2014-31 December 2014 .....                                                                                                                   | 14 |

## Data selection flow diagrams

Flow diagrams of data selection of register data extracted for the study period 2010-01-01 to 2014-12-31.

First the data was selected based on the data set of events (instances, diagnoses, or, in data terms, lines), then the number of unique individuals in the data were identified\* for extracting demographic information for the description of the study population characteristics found in Table 1. The time series used in Table 2 and further analysis was aggregated from the events based data.\*\*

### Flow diagram 1: Anti-asthma medication data

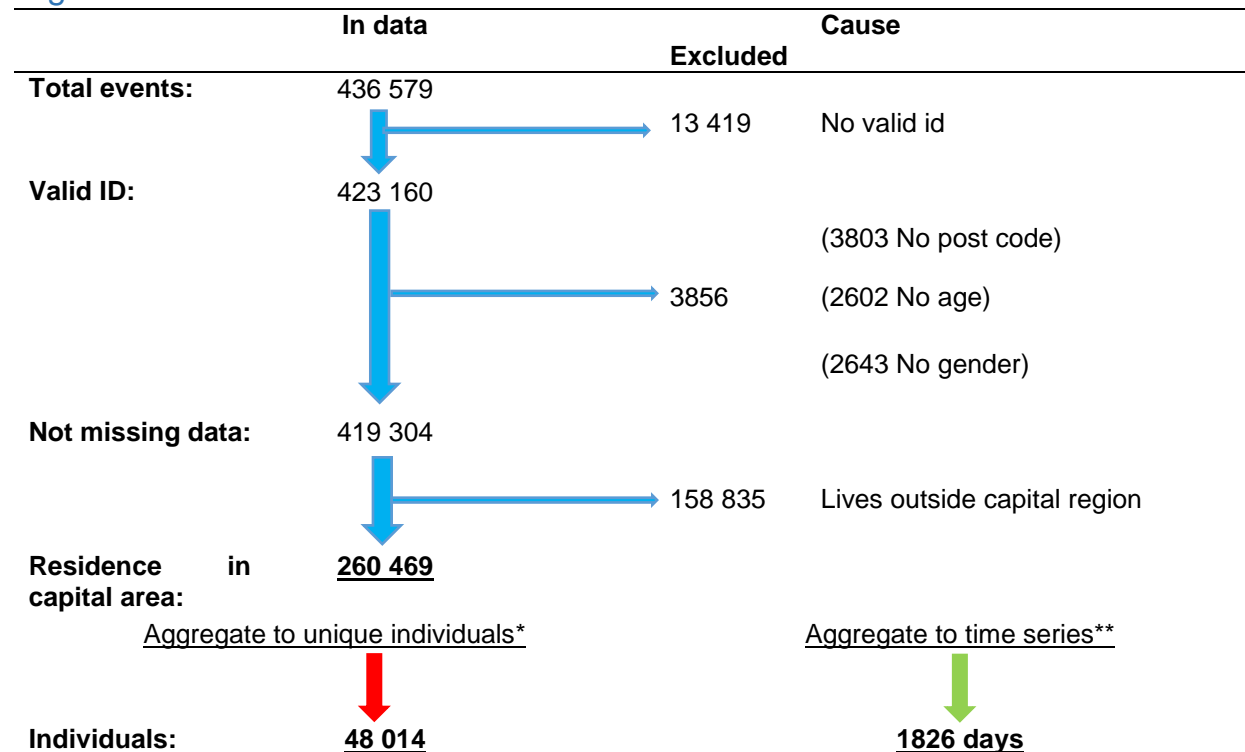

Flow diagram 2: Primary care center (PCC data) for respiratory diagnoses

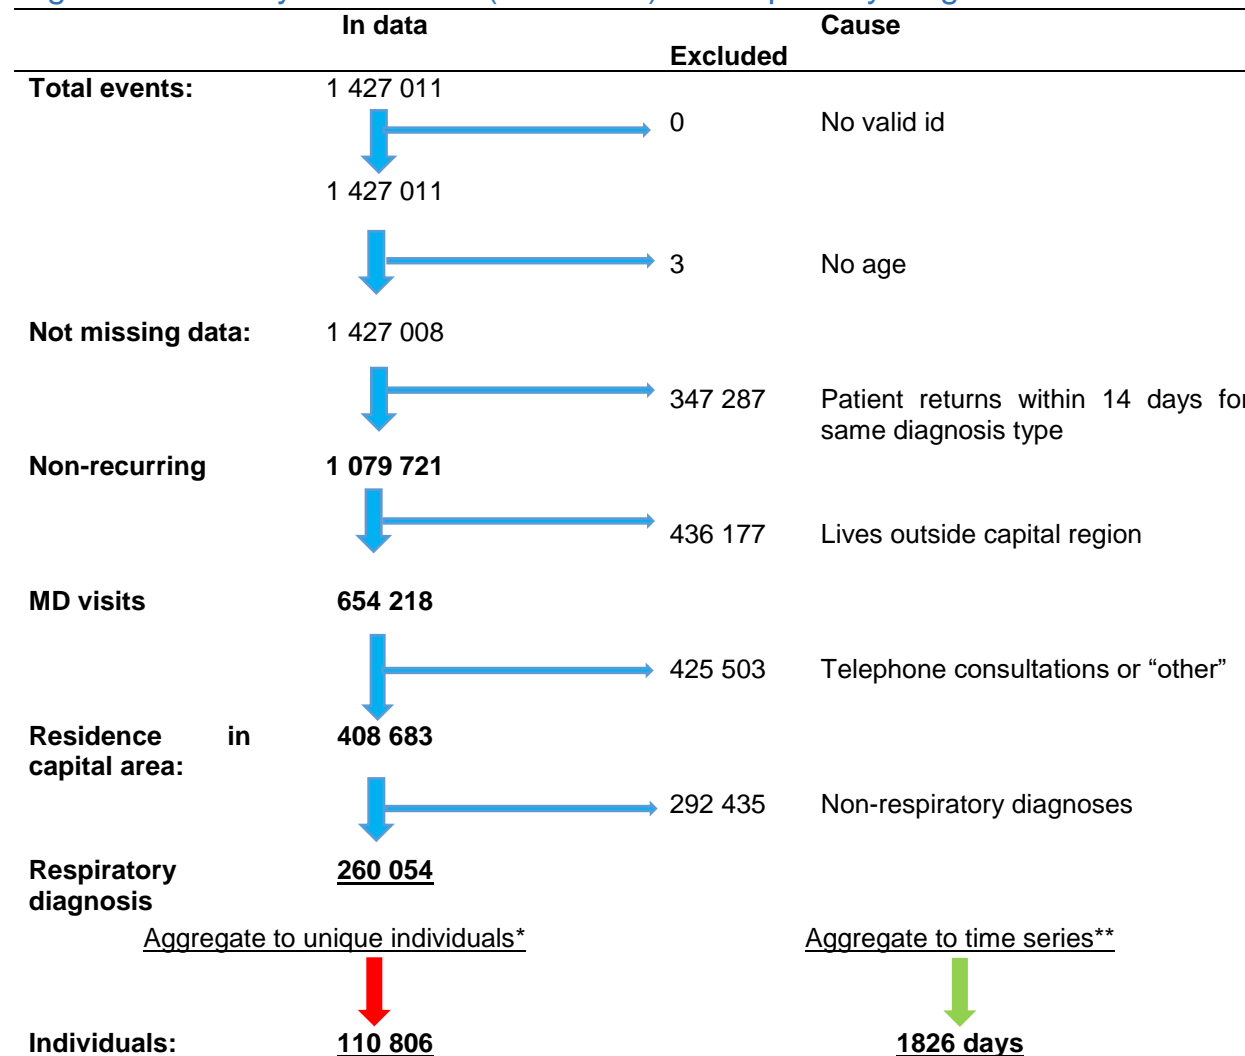

Flow diagram 3: Hospital emergency department visits data for selected diagnoses

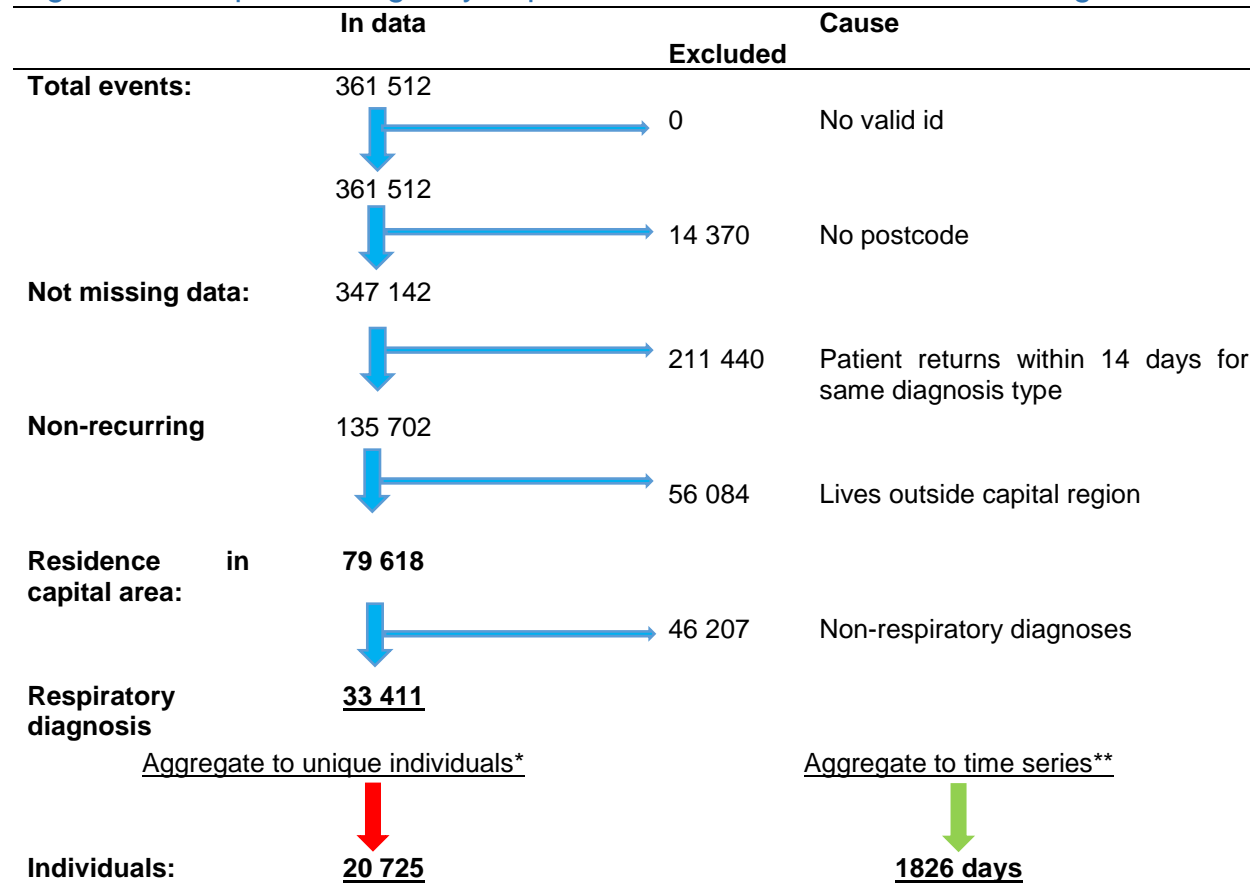

## Supplementary figures

Figure S1 Days with high SO<sub>2</sub> (>125 µg/m<sup>3</sup>) and associations with respiratory health outcomes across lags 0-10 (plotted using DLNM<sup>1</sup>)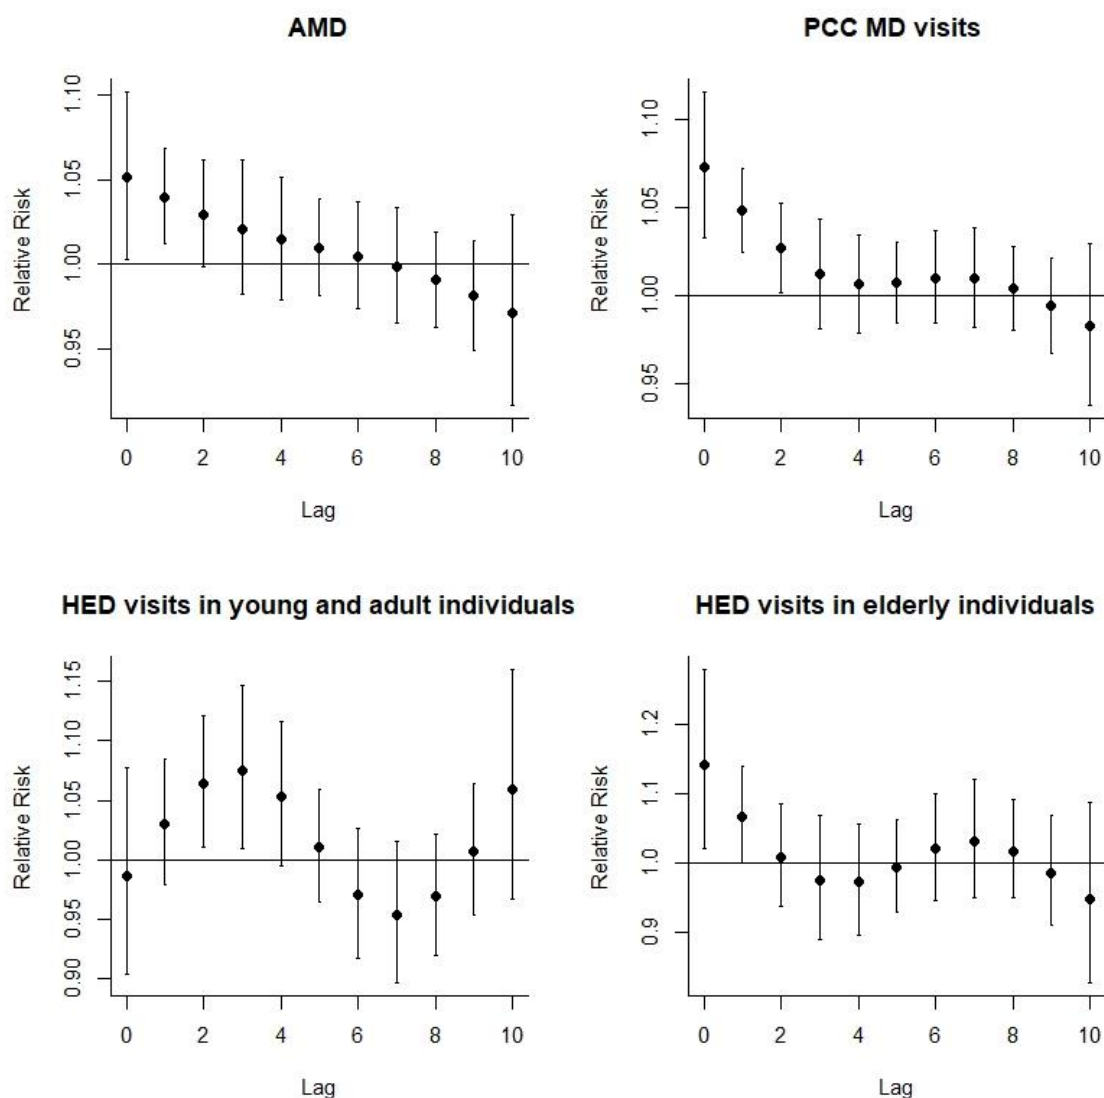

<sup>1</sup> Crossbasis defined to predict for values of SO<sub>2</sub> from 0 to 125 µg/m<sup>3</sup> with a natural spline with four degrees of freedom for the lag-structure up to lag 10. Models were adjusted for time trends as the main models, but not adjusted for other pollutants. Crosspred function was centered at 5 and predicting to 125 µg/m<sup>3</sup>.

Figure S2 Concentration-response for SO<sub>2</sub> and health outcomes (plotted using DLNM<sup>2</sup>)

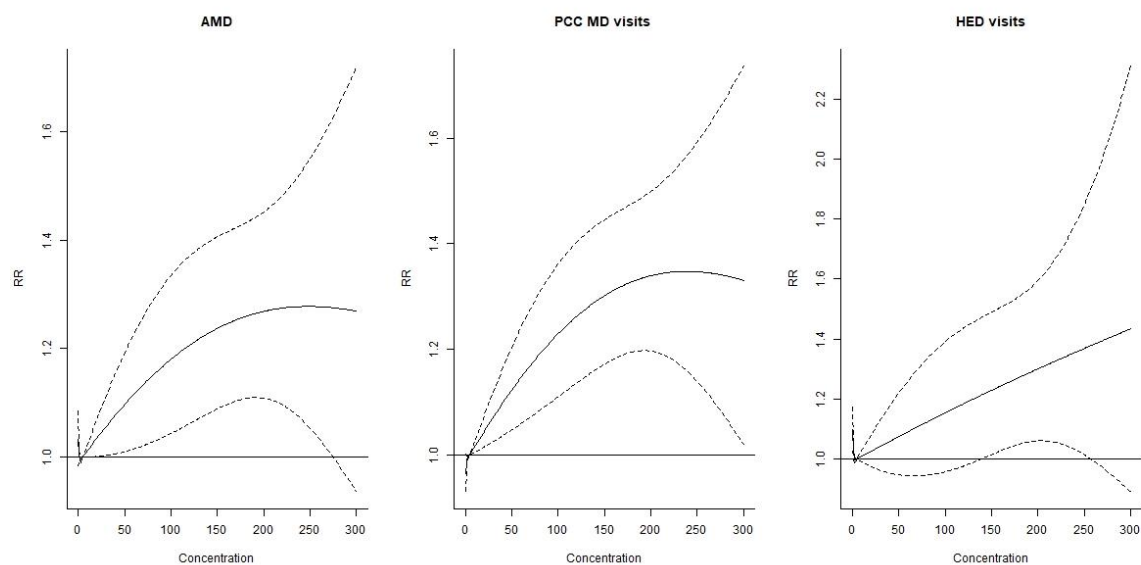

Crossbasis for variable values and lags have four degrees of freedom each.

<sup>2</sup> Crossbasis for variable values have four degrees of freedom, lags 0- lag 2 for AMD and PCC, lag 0- lag 4 for HED. Model is adjusted for time trend as the main model, but not other pollutants. The prediction is centered at 5 and set to predict to 300.

Figure S3 Associations between high SO<sub>2</sub> days (>125 ug/m<sup>3</sup>) and subcategories of PCMD and HED (plotted using DLNM)

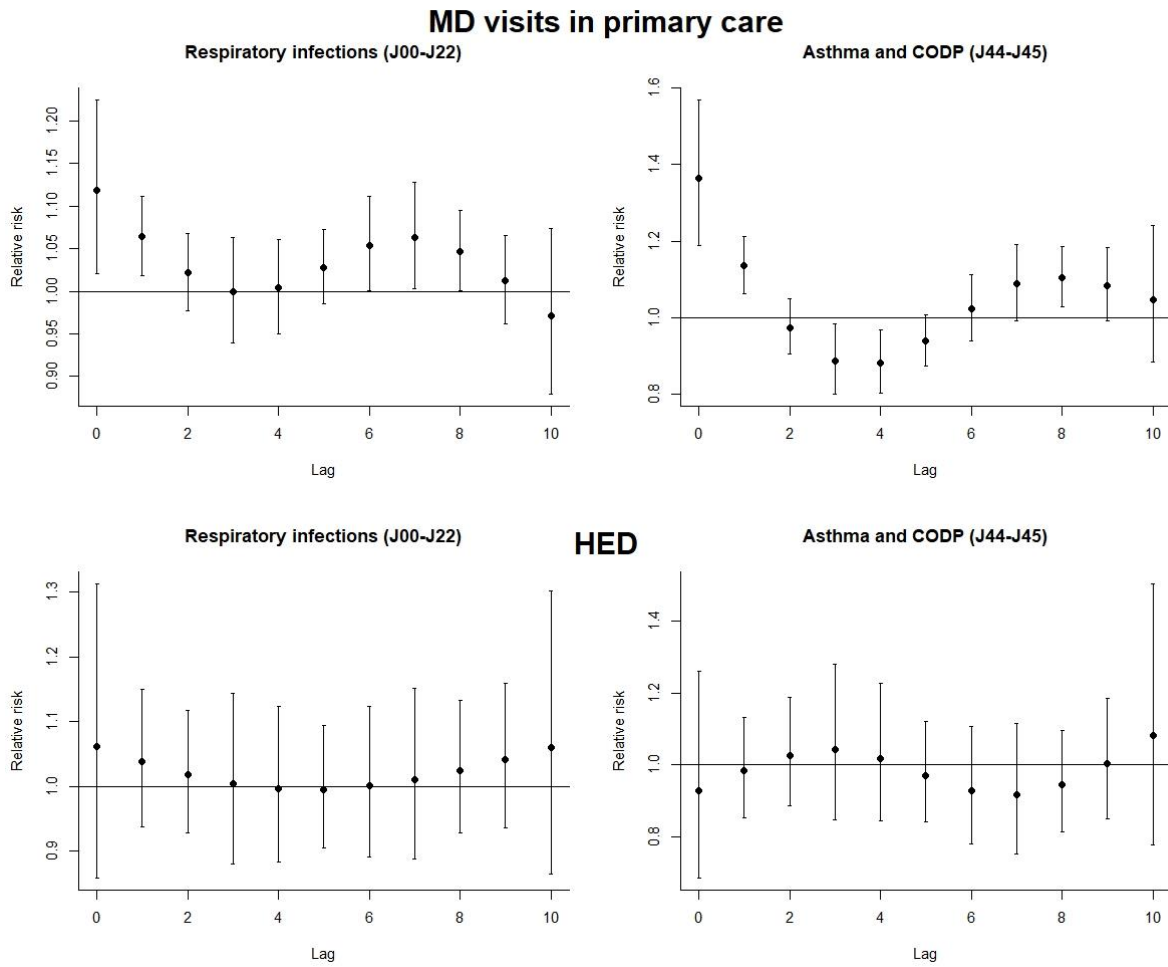

Figure S4 Lag-associations to lag 20 (plotted using DLNM<sup>3</sup>)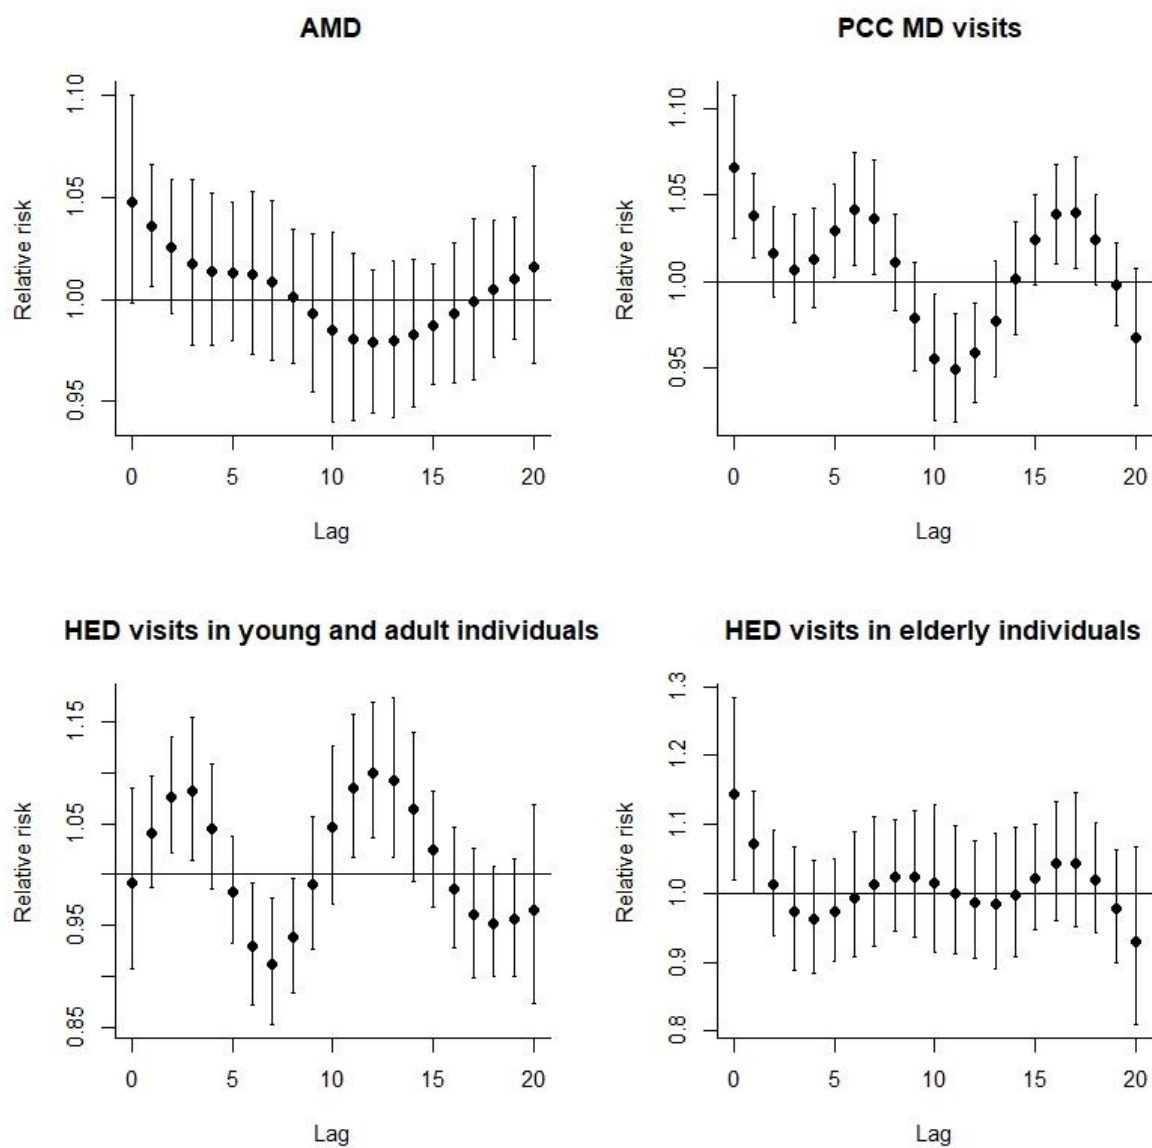

<sup>3</sup> Crossbasis with a threshold predicting from 0 to 125, lag-structure with natural spline and 7 degrees of freedom. Crosspred predicts from 5 to 125.



Figure S5 Time series of daily mean of air pollutants 2010-2014.

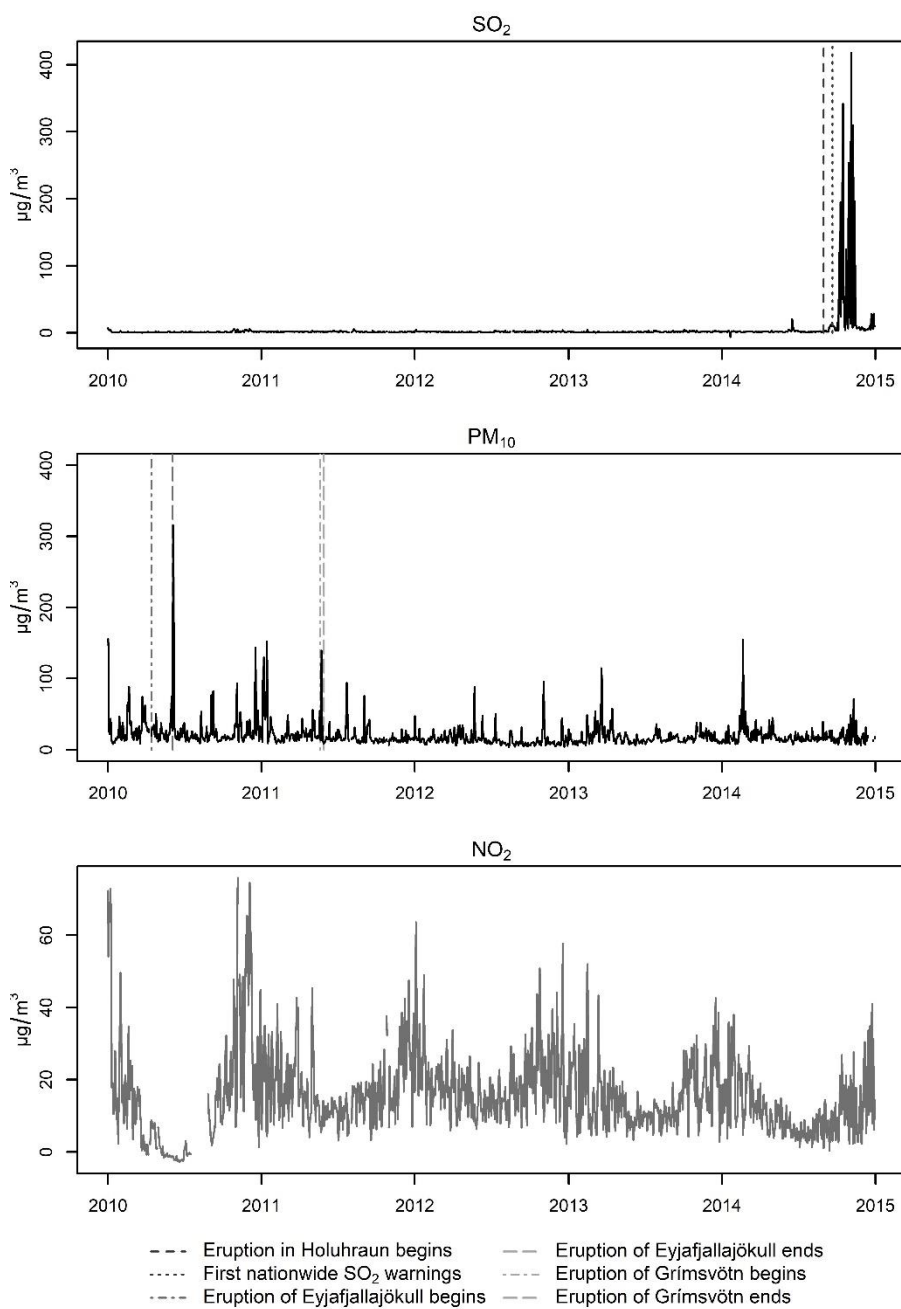

## Supplementary tables

Table S1 Percent increased risk in respiratory health outcomes associated with daily SO<sub>2</sub> exposure at lag 0-2, not adjusting for other pollutants (corresponding to Table 3)

|                                            | SO <sub>2</sub> (per 10 µg/m <sup>3</sup> ) |               | SO <sub>2</sub> levels >125 µg/m <sup>3</sup> |               |
|--------------------------------------------|---------------------------------------------|---------------|-----------------------------------------------|---------------|
|                                            | %                                           | 95% CI        | %                                             | 95% CI        |
| <b>Anti-asthma medication (AMD)</b>        |                                             |               |                                               |               |
| All                                        | 1.10%                                       | 0.53 - 1.67%  | 13.4%                                         | 4.7 – 22.8%   |
| Children 0-17                              | 1.68%                                       | 0.84 - 2.52%  | 23.1%                                         | 9.5 – 38.4%   |
| Adults 18-65                               | 1.07%                                       | 0.42 – 1.71%  | 13.2%                                         | 3.4 – 24.1%   |
| Elderly >65                                | 0.87%                                       | 0.16 – 1.60%  | 9.1%                                          | -1.6 – 21.0%  |
| <b>Primary care MD visits (PCMD)</b>       |                                             |               |                                               |               |
| All                                        | 1.49%                                       | 1.00 – 1,89%  | 20.8%                                         | 12.9 – 29.3%  |
| Children 0-17                              | 1.27%                                       | 0.49 – 2.05%  | 15.1%                                         | 3.6 – 27.9%   |
| Adults 18-65                               | 1.50%                                       | 0.98 – 2.02%  | 23.2%                                         | 14.8 – 32.3%  |
| Elderly >65                                | 1.39%                                       | 0.48 – 2.31%  | 15.7%                                         | 1.8 – 31.4%   |
| <b>Hospital Emergency Department (HED)</b> |                                             |               |                                               |               |
| All                                        | 0.84%                                       | -0.08 – 1.76% | 12.0%                                         | -1.0 – 26.8%  |
| Children 0-17                              | 0.89%                                       | -0.73 – 2.55% | 8.9%                                          | -13.0 – 36.2% |
| Adults 18-65                               | 0.61%                                       | -0.80 – 2.04% | 10.4%                                         | -8.8 – 33.8%  |
| Elderly >65                                | 1.70%                                       | 0.26 – 3.16%  | 25.8%                                         | 3.5 – 52.9%   |

Models are adjusted for season, time, day of week, odd holidays, the outcome at lag1, and MD strike for PCC and HED. n=1788.

### Table S2 Sensitivity analyses: Outcome variable definitions

Association between SO<sub>2</sub> as both continuous variables and as indicator of days with high levels (SO<sub>2</sub>>125 ug/m<sup>3</sup>) and changes in anti-asthma medication dispensing, respiratory primary care center contacts and hospital emergency visits and admissions due to respiratory illness.

|                                                                | SO <sub>2</sub> (per 10 µg/m <sup>3</sup> ) |               | SO <sub>2</sub> levels >125<br>ug/m <sup>3</sup> |                |
|----------------------------------------------------------------|---------------------------------------------|---------------|--------------------------------------------------|----------------|
|                                                                | %                                           | 95% CI        | %                                                | 95% CI         |
| <u>Primary care – All contacts (lag 0-2)</u>                   |                                             |               |                                                  |                |
| All                                                            | 1.50%                                       | 1.04 – 1.96%  | 24.8%                                            | 16.8 – 33.3%   |
| Children 0-17                                                  | 1.31%                                       | 0.55 – 2.06%  | 17.5%                                            | 5.7 – 30.7%    |
| Adults 18-65                                                   | 1.48%                                       | 0.99 – 1.96%  | 26.8%                                            | 18.3 – 35.9%   |
| Elderly >65                                                    | 1.44%                                       | 0.69 – 2.19%  | 21.5%                                            | 9.0 – 35.4%    |
| <u>Primary care - including recurring contacts (lag 0-2)</u>   |                                             |               |                                                  |                |
| All                                                            | 1.49%                                       | 1.05 – 1.94%  | 25.3%                                            | 17.5 – 33.6%   |
| Children 0-17                                                  | 1.34%                                       | 0.60 – 2.09%  | 17.3%                                            | 5.6 – 30.6%    |
| Adults 18-65                                                   | 1.48%                                       | 1.00 – 1.95%  | 27.3%                                            | 18.9 – 36.2%   |
| Elderly >65                                                    | 1.56%                                       | 0.84 – 2.28%  | 25.1%                                            | 12.7 – 38.9%   |
| <u>Admissions from Hospital emergency department (lag 0-2)</u> |                                             |               |                                                  |                |
| All                                                            | 0.73%                                       | -0.76 – 2.23% | 15.3%                                            | -10.4 – 48.3%  |
| Children 0-17*                                                 | 3.92%                                       | -0.47- 8.32%  | 111.2%                                           | -12.0 – 407.0% |
| Adults 18-65                                                   | 0.64%                                       | -1.98 – 3.26% | 2.2%                                             | -37.3 – 66.6%  |
| Elderly >65                                                    | 0.49%                                       | -1.34 – 2.33% | 15.1%                                            | -15.8 – 57.2%  |
| <u>Admissions from Hospital emergency department (lag 2-4)</u> |                                             |               |                                                  |                |
| All                                                            | 1.65%                                       | -0.11 – 3.42% | 18.5%                                            | -7.5 – 52.0%   |
| Children 0-17*                                                 | 6.00%                                       | 1.29 – 10.7%  | 175.2%                                           | 20.9 – 526.2%  |
| Adults 18-65                                                   | 2.03%                                       | -0.86 – 4.92% | 20.9%                                            | -22.9 – 89.6%  |
| Elderly >65                                                    | 0.83%                                       | -1.39 – 3.05% | 7.8%                                             | -21.3 – 47.8%  |

Models are adjusted for season, time, day of week, odd holidays, temperature, relative humidity, and the outcome at lag1, NO<sub>2</sub>, PM<sub>10</sub> at the same lags. n=1705 for all.

**Table S3 Sensitivity analyses: Exposure definitions and subsets**

Association between SO<sub>2</sub> as both continuous variables and as indicator of days with high levels (SO<sub>2</sub>>125 ug/m<sup>3</sup>) and changes in anti-asthma medication dispensing, respiratory PCMD and visits and hospital emergency visits and admissions

|                                                                                                  | SO <sub>2</sub> (per 10 µg/m <sup>3</sup> ) |               | SO <sub>2</sub> levels >125 ug/m <sup>3</sup> |               |
|--------------------------------------------------------------------------------------------------|---------------------------------------------|---------------|-----------------------------------------------|---------------|
|                                                                                                  | %                                           | 95% CI        | %                                             | 95% CI        |
| <b><u>Excluding the first day in series of consecutive high SO<sub>2</sub> exposure days</u></b> |                                             |               |                                               |               |
| <u>Asthma medication (AMD, lag 0 – 2)</u>                                                        |                                             |               |                                               |               |
| All                                                                                              | 0.99%                                       | -0.30 – 2.30% | 14.8%                                         | 4.5 – 26.2%   |
| Children 0 – 17                                                                                  | 2.21%                                       | 0.30 – 4.16%  | 20.9%                                         | 5.2 – 39.0%   |
| Adults 18 – 65                                                                                   | 0.58%                                       | -0.91 – 2.10% | 13.7%                                         | 2.1 – 26.9%   |
| Elderly >65                                                                                      | 0.76%                                       | -0.91 – 2.46% | 13.5%                                         | 0.5 – 28.2%   |
| <u>Primary care MD visits (PCMD, lag 0-2)</u>                                                    |                                             |               |                                               |               |
| All                                                                                              | 1.65%                                       | 0.59 – 2.71%  | 21.8%                                         | 12.7 – 31.7%  |
| Children 0-17                                                                                    | 2.16%                                       | 0.57 – 3.77%  | 15.9%                                         | 2.7 – 30.9%   |
| Adults 18-65                                                                                     | 1.26%                                       | 0.13 – 2.40%  | 23.5%                                         | 13.8 – 34.1%  |
| Elderly >65                                                                                      | 1.36%                                       | -0.36 – 3.12% | 23.1%                                         | 8.8 – 39.2%   |
| <b><u>Excluding the first week of high SO<sub>2</sub> exposure</u></b>                           |                                             |               |                                               |               |
| <u>Anti – asthma medication (AMD, lag 0 – 2)</u>                                                 |                                             |               |                                               |               |
| All                                                                                              | 1.04%                                       | 0.37 – 1.71%  | 11.5%                                         | 2.2 – 21.7%   |
| Children 0 – 17                                                                                  | 1.54%                                       | 0.52 – 2.57%  | 15.3%                                         | 1.1 – 31.5%   |
| Adults 18 – 65                                                                                   | 1.16%                                       | 0.40 – 1.93%  | 13.3%                                         | 2.6 – 25.2%   |
| Elderly >65                                                                                      | 1.16%                                       | 0.29 – 2.04%  | 7.9%                                          | -3.7 – 20.8%  |
| <u>Primary care MD visits (PCMD, lag 0-2)</u>                                                    |                                             |               |                                               |               |
| All                                                                                              | 1.57%                                       | 1.01 – 2.13%  | 21.2%                                         | 12.9 – 30.0%  |
| Children 0 – 17                                                                                  | 1.22%                                       | 0.31 – 2.14%  | 11.7%                                         | -0.4 – 25.2%  |
| Adults 18 – 65                                                                                   | 1.55%                                       | 0.95 – 2.15%  | 23.0%                                         | 14.0 – 32.6%  |
| Elderly >65                                                                                      | 1.55%                                       | 0.65 – 2.46%  | 24.0%                                         | 10.8 – 38.9%  |
| <b><u>Lag 2-4 of Hospital emergency department</u></b>                                           |                                             |               |                                               |               |
| All                                                                                              | 1.14%                                       | 0.18 -2.10%   | 11.7%                                         | -1.8 – 25.9%  |
| Children 0-17                                                                                    | 2.09%                                       | 0.51 – 3.70%  | 22.6%                                         | -3.0 – 55.0%  |
| Adults 18-65                                                                                     | 1.11%                                       | -0.39 – 2.63% | 7.3%                                          | -12.6 – 31.6% |
| Elderly >65                                                                                      | 0.78%                                       | -0.84 – 2.42% | 11.8%                                         | -10.0 – 38.8% |
| <b><u>Years 2012-14</u></b>                                                                      |                                             |               |                                               |               |
| <u>Anti – asthma medication (AMD, lag 0 – 2)</u>                                                 |                                             |               |                                               |               |
| All                                                                                              | 0.70%                                       | 0.02 – 1.38%  | 8.5%                                          | -0.9 – 18.8%  |
| Children 0 – 17                                                                                  | 1.02%                                       | 0.06 – 1.99%  | 13.5%                                         | 0.1 – 28.7%   |
| Adults 18 – 65                                                                                   | 0.73%                                       | -0.03 – 1.51% | 9.8%                                          | -1.0 – 21.6%  |
| Elderly >65                                                                                      | 0.63%                                       | -0.24 – 1.51% | 5.5%                                          | -6.3 – 18.8%  |
| <u>Primary care MD visits (PCMD, lag 0-2)</u>                                                    |                                             |               |                                               |               |
| All                                                                                              | 1.39%                                       | 0.85 – 1.92%  | 20.8%                                         | 12.5 – 29.5%  |
| Children 0 – 17                                                                                  | 0.96%                                       | 0.13 – 1.79%  | 10.7%                                         | -0.9 – 23.7%  |
| Adults 18 – 65                                                                                   | 1.55%                                       | 0.98 – 2.13%  | 26.5%                                         | 17.1 – 36.6%  |
| Elderly >65                                                                                      | 1.26%                                       | 0.27 – 2.26%  | 14.5%                                         | -0.5 – 31.7%  |
| <u>Hospital emergency department (HED, (lag 0-2)</u>                                             |                                             |               |                                               |               |
| All                                                                                              | 0.81%                                       | -0.13 – 1.76% | 6.7%                                          | -5.9 – 20.9%  |
| Children 0-17                                                                                    | 0.80%                                       | -1.03 – 2.66% | -0.3%                                         | -22.0 – 27.5% |
| Adults 18-65                                                                                     | -0.11%                                      | -1.52 – 1.32% | 3.9%                                          | -13.8 – 25.4% |
| Elderly >65                                                                                      | 1.66%                                       | 0.14 – 3.20%  | 13.8%                                         | -7.7 – 40.3%  |

Models are adjusted for season, time, day of week, and odd holidays, and the outcome at lag1, NO<sub>2</sub>, PM<sub>10</sub>, temperature, and relative humidity at the same lags as SO<sub>2</sub>. \* n=1705 for the whole dataset analyses, and 1054 for the analysis of the years 2012-14.

**Table S4a Correlation matrix**

Period before eruption 1 Jan 2010-august 31 2014

| N=1632            | SO <sub>2</sub> | PM <sub>10</sub> | NO <sub>2</sub> | Temperature | Relative humidity |
|-------------------|-----------------|------------------|-----------------|-------------|-------------------|
| SO <sub>2</sub>   | 1               |                  |                 |             |                   |
| PM <sub>10</sub>  | -0.006          | 1                |                 |             |                   |
| NO <sub>2</sub>   | 0.429*          | 0.002            | 1               |             |                   |
| Temperature       | -0.069*         | -0.143           | -0.528*         | 1           |                   |
| Relative humidity | 0.0130          | 0.073*           | -0.113*         | -0.076*     | 1                 |

**Table S4b Period after eruption began 31 August 2014-31 December 2014**

| N=109             | SO <sub>2</sub> | PM <sub>10</sub> | NO <sub>2</sub> | Temperature | Relative humidity |
|-------------------|-----------------|------------------|-----------------|-------------|-------------------|
| SO <sub>2</sub>   | 1               |                  |                 |             |                   |
| PM <sub>10</sub>  | 0.403*          | 1                |                 |             |                   |
| NO <sub>2</sub>   | 0.075           | 0.400*           | 1               |             |                   |
| Temperature       | -0.036          | -0.129           | -0.620*         | 1           |                   |
| Relative humidity | -0.556*         | -0.352*          | -0.050          | 0.081       | 1                 |
